# Supplementary material
Source: publisher site journal article supplement (http://kjim.org/upload/media/kjim-2020-142-suppl10.pdf)
Supplement: Supplementary file 1 [file kjim-2020-142-suppl10.pdf]

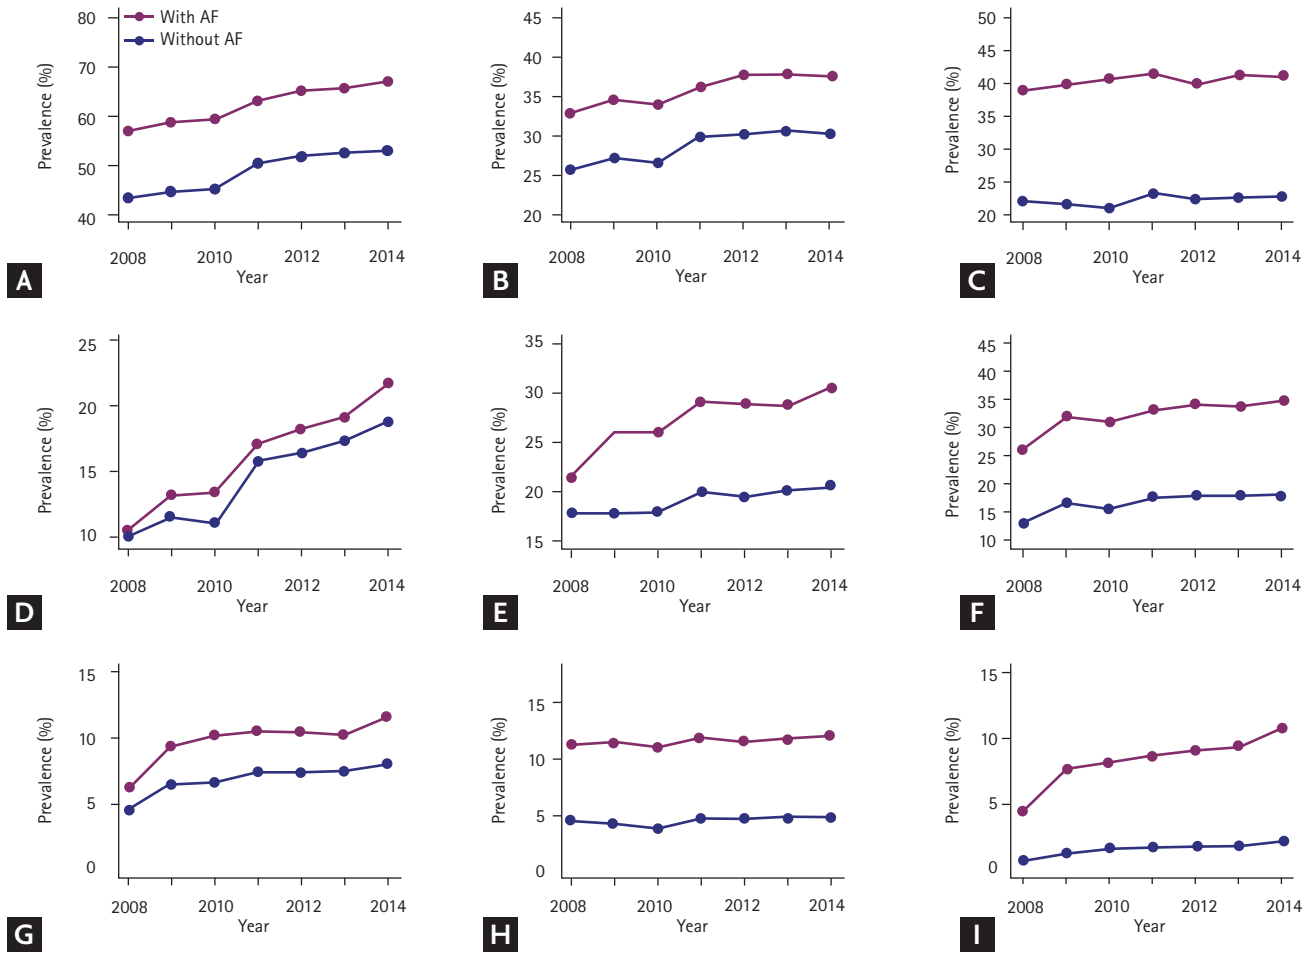

**Supplementary Figure 1.** Temporal trends in risk factor profiles among critically ill patients with versus without atrial fibrillation: (A) hypertension, (B) diabetes, (C) congestive heart failure, (D) obesity, (E) chronic renal failure, (F) coronary artery disease, (G) prior stroke, (H) valvular disease, and (I) long-term anticoagulants.
